# Supplementary material for: A Proteome Approach Reveals Differences between Fertile Women and Patients with Repeated Implantation Failure on Endometrial Level—Does hCG Render the Endometrium of RIF Patients?
Source: MDPI journal article supplement (doi:10.3390/ijms20020425), 2019-01-19
Supplement: s1 [file s1]

## Supplementary Material

Table S1: Biosystems with proteins showing an altered abundance in endometrial tissue (+/- hCG) and/or ESCs (+/- hCG).

| biosystem                        | tissue of RIF vs. tissue of fertile controls | cells of RIF +/-hCG | cells of RIF +hCG versus tissue of fertile controls | tissue of in vivo hCG-incubation vs. tissue of fertile controls |
|----------------------------------|----------------------------------------------|---------------------|-----------------------------------------------------|-----------------------------------------------------------------|
| metabolism                       | •                                            | •                   | •                                                   | •                                                               |
| immune system                    | •                                            | •                   | •                                                   | •                                                               |
| cytoskeleton                     | •                                            | •                   | •                                                   | •                                                               |
| endoplasic reticulum             | •                                            |                     |                                                     |                                                                 |
| ferroptosis                      | •                                            |                     | •                                                   | •                                                               |
| wound healing                    | •                                            | •                   |                                                     | •                                                               |
| response to stimulus             | •                                            |                     | •                                                   |                                                                 |
| apoptosis/cell death             | •                                            |                     | •                                                   | •                                                               |
| cell adhesion/cell junction      | •                                            |                     | •                                                   |                                                                 |
| proteoglycans                    | •                                            |                     | •                                                   |                                                                 |
| biological regulation            |                                              | •                   |                                                     |                                                                 |
| gene expression                  |                                              | •                   |                                                     |                                                                 |
| cell cycle                       |                                              | •                   | •                                                   |                                                                 |
| pathways/microRNAs in cancer     |                                              | •                   | •                                                   |                                                                 |
| cytoplasm                        |                                              | •                   | •                                                   |                                                                 |
| developmental biology            |                                              | •                   |                                                     |                                                                 |
| cytokine signaling               |                                              | •                   | •                                                   |                                                                 |
| secretion                        |                                              |                     | •                                                   |                                                                 |
| estrogen signaling               | •                                            |                     |                                                     |                                                                 |
| TNF $\alpha$ /NfkappaB signaling | •                                            |                     |                                                     |                                                                 |
| PPAR signaling                   | •                                            |                     |                                                     |                                                                 |
| embryo implantation              | •                                            |                     |                                                     |                                                                 |
| intracellular transport          |                                              | •                   |                                                     |                                                                 |
| respiratory chain                |                                              | •                   |                                                     |                                                                 |
| signal transduction              |                                              | •                   |                                                     |                                                                 |
| cell growth                      |                                              | •                   |                                                     |                                                                 |
| transmembrane transport          |                                              | •                   |                                                     |                                                                 |

|                         |  |  |   |   |
|-------------------------|--|--|---|---|
| membrane                |  |  | • |   |
| extracellular transport |  |  | • |   |
| response to stress      |  |  | • |   |
| deubiquitination        |  |  | • |   |
| homeostasis             |  |  | • |   |
| glycolysis              |  |  | • |   |
| insulin signaling       |  |  | • |   |
| misregulation in cancer |  |  | • |   |
| endocytosis             |  |  |   | • |
| HIF1 signaling          |  |  |   | • |
| chemokine production    |  |  |   | • |

Table S2: Proteins that have been published and were associated with following categories: endometrium, decidua, placenta, embryo and/or endometriosis (arrows ↓ lower abundant in the comparison, ↑ higher abundant; \* statistical significance p< 0.05).

| proteins published in endometrium, decidua pregnancy, placenta, embryo, endometriosis | tissue of RIF vs. tissue of fertile controls | cells of RIF +/-hCG | cells of RIF +hCG versus tissue of fertile controls | tissue of <i>in vivo</i> hCG-incubation vs. tissue of fertile controls |
|---------------------------------------------------------------------------------------|----------------------------------------------|---------------------|-----------------------------------------------------|------------------------------------------------------------------------|
| ENPP3                                                                                 | ↑*                                           |                     |                                                     | ↑*                                                                     |
| EPPK1                                                                                 | ↑*                                           |                     |                                                     |                                                                        |
| BCLAF1                                                                                | ↑*                                           |                     |                                                     |                                                                        |
| HLA-A                                                                                 | ↑                                            |                     |                                                     |                                                                        |
| FKBP5                                                                                 | ↑                                            |                     |                                                     |                                                                        |
| PTMA                                                                                  | ↓*                                           |                     |                                                     |                                                                        |
| APOA2                                                                                 | ↓                                            |                     |                                                     |                                                                        |
| Fibulin-1                                                                             | ↓                                            |                     |                                                     |                                                                        |
| PIGR                                                                                  | ↓                                            |                     |                                                     |                                                                        |
| VTN                                                                                   | ↓                                            |                     |                                                     |                                                                        |
| PON1                                                                                  | ↓                                            |                     |                                                     |                                                                        |
| PAM                                                                                   | ↓                                            |                     |                                                     |                                                                        |
| IGFBP7                                                                                |                                              | ↑                   | ↑*                                                  | ↓                                                                      |
| RPS28                                                                                 |                                              | ↑                   |                                                     |                                                                        |
| NUP88                                                                                 |                                              | ↑                   |                                                     |                                                                        |
| SIAE                                                                                  |                                              | ↑                   |                                                     |                                                                        |
| ALCAM                                                                                 |                                              | ↑                   |                                                     |                                                                        |
| NSUN2                                                                                 |                                              | ↑                   |                                                     |                                                                        |
| GOLGA2                                                                                |                                              | ↑                   |                                                     |                                                                        |
| HIST1H4A                                                                              |                                              | ↑                   |                                                     |                                                                        |
| PHB2                                                                                  |                                              | ↑                   |                                                     |                                                                        |
| RPS27A                                                                                |                                              | ↑                   |                                                     |                                                                        |
| OSBPL8                                                                                |                                              | ↑                   |                                                     |                                                                        |
| TFRC                                                                                  |                                              | ↑                   |                                                     |                                                                        |
| SLC25A24                                                                              |                                              | ↑                   |                                                     |                                                                        |
| ACAT1                                                                                 |                                              | ↑                   |                                                     |                                                                        |
| NRAS                                                                                  |                                              | ↓*                  |                                                     |                                                                        |
| COL1A2                                                                                |                                              | ↓                   | ↓*                                                  |                                                                        |
| RPL13                                                                                 |                                              | ↓                   |                                                     |                                                                        |
| TUBB8                                                                                 |                                              | ↓                   |                                                     |                                                                        |
| NDUFA4                                                                                |                                              | ↓                   |                                                     |                                                                        |
| HDAC1                                                                                 |                                              | ↓                   |                                                     |                                                                        |
| NDUFA2                                                                                |                                              | ↓                   |                                                     |                                                                        |
| NES                                                                                   |                                              | ↓                   |                                                     |                                                                        |
| AASDHPPT                                                                              |                                              | ↓                   |                                                     |                                                                        |
| HSD17B12                                                                              |                                              | ↓                   |                                                     |                                                                        |
| FMR1                                                                                  |                                              | ↓                   |                                                     |                                                                        |
| TIGAR                                                                                 |                                              | ↓                   |                                                     |                                                                        |
| UCHL1                                                                                 |                                              |                     | ↑*                                                  |                                                                        |
| GLRX3                                                                                 |                                              |                     | ↑*                                                  |                                                                        |
| TXNRD1                                                                                |                                              |                     | ↑*                                                  |                                                                        |
| CD 59                                                                                 |                                              |                     | ↑*                                                  |                                                                        |
| AKR1B1                                                                                |                                              |                     | ↑*                                                  |                                                                        |
| NNMT                                                                                  |                                              |                     | ↑*                                                  |                                                                        |
| PBXIP1                                                                                |                                              |                     | ↑*                                                  |                                                                        |
| HK2                                                                                   |                                              |                     | ↑*                                                  |                                                                        |
| MMP3                                                                                  |                                              |                     | ↑*                                                  |                                                                        |
| NQO1                                                                                  |                                              |                     | ↑*                                                  |                                                                        |
| Actin                                                                                 |                                              |                     | ↑*                                                  |                                                                        |
| ITGB5                                                                                 |                                              |                     | ↑*                                                  |                                                                        |
| CUL4B                                                                                 |                                              |                     | ↑*                                                  |                                                                        |

|                 |  |  |    |    |
|-----------------|--|--|----|----|
| RPS6            |  |  | ↑* |    |
| LEPRE1          |  |  | ↑* |    |
| TAGLN           |  |  | ↑* |    |
| Serotransferrin |  |  | ↓* |    |
| IGHG1           |  |  | ↓* |    |
| IGHA1           |  |  | ↓* |    |
| HBD             |  |  | ↓* |    |
| CKB             |  |  | ↓* |    |
| Serpin A3       |  |  | ↓* |    |
| CAPS            |  |  | ↓* |    |
| ORM1            |  |  | ↓* |    |
| CAT             |  |  | ↓* |    |
| GSN             |  |  | ↓* |    |
| ACOX1           |  |  | ↓* |    |
| APOA4           |  |  | ↓* |    |
| SNX5            |  |  | ↓* |    |
| KRT18           |  |  | ↓* |    |
| OGN             |  |  | ↓* |    |
| EPCAM           |  |  | ↓* |    |
| HIST1H2BN       |  |  | ↓* |    |
| DSP             |  |  | ↓* |    |
| ACSL5           |  |  | ↓* |    |
| C3              |  |  | ↓* |    |
| SERPIN G1       |  |  | ↓* |    |
| Serpin A1       |  |  | ↓* |    |
| APOA1           |  |  | ↓* |    |
| HPX             |  |  | ↓* |    |
| CA2             |  |  | ↓* |    |
| ITIH4           |  |  | ↓* |    |
| ITIH1           |  |  | ↓* |    |
| ADD1            |  |  | ↓* |    |
| PPCD4           |  |  | ↓* |    |
| GC              |  |  | ↓* |    |
| CA1             |  |  | ↓* |    |
| TTR             |  |  | ↓* |    |
| FGG             |  |  | ↓* |    |
| FGA             |  |  | ↓* |    |
| ALDH1A2         |  |  | ↓* |    |
| PRKAR2A         |  |  | ↓* |    |
| ASRGL1          |  |  | ↓* |    |
| SORD            |  |  | ↓* |    |
| GUSB            |  |  | ↓* |    |
| C4BPA           |  |  | ↓* |    |
| LTF             |  |  |    | ↑* |
| MYLK            |  |  |    | ↑  |
| MAOA            |  |  |    | ↑  |
| PTMA            |  |  |    | ↓  |
| Galectin-9      |  |  |    | ↓  |
| XPO5            |  |  |    | ↓  |
| CTSC            |  |  |    | ↓  |
| PDIA3           |  |  |    | ↓  |
